# Supplementary material for: The fecal microbiota of piglets during weaning transition and its association with piglet growth across various farm environments
Source: PLoS One. 2021 Apr 27;16(4):e0250655. doi: 10.1371/journal.pone.0250655 (PMC8078812; doi:10.1371/journal.pone.0250655)
Supplement: S2 Table — The numbers and characteristics (minimal number of reads and number of OTU) of the microbiota dataset are presented. Datasets after rarefaction were used to study alpha diversity. Datasets not rarefied but filtered were used to do the other analyses. (XLSX) [file pone.0250655.s003.xlsx]

## Sheet: Feuil1
	S2 Table : numbers and caracteristics (minimal number of reads and number of OTU) of the microbiota dataset
Datasets after rarefaction are used to study alpha diversity.
Datasets not rarefied but filtered are used to do the other analyses.
	Description	Nb of samples	Nb of OTUs	Minimal Nb of reads per sample
26-day-old piglets	Feces samples collected and extracted (including water and repeated samples)	305	1504	0
	Dataset including samples with at least 5 000 reads	252	1504	5016
	Dataset filtered by repeated samples and water samples	222	1504	5016
	Dataset including OTUs of known Phylum that are present in at least 5 samples	222	1490	5003
	Dataset after rarefaction (by resampling the OTU table such that all samples have the same library size)	222	1490	5003
	Dataset rarefied and filtered to keep OTUs with total abundance higher than 0.01% of the total number of reads	222	1177	4831
35-day-old piglets	Feces samples collected and extracted (including water and repeated samples)	348	1504	1
	Dataset including samples with at least 5 000 reads	288	1504	5030
	Dataset filtered by repeated samples and water samples	254	1504	5030
	Dataset including OTUs of known Phylum that are present in at least 5 samples	254	1490	5030
	Dataset after rarefaction (by resampling the OTU table such that all samples have the same library size)	254	1490	5030
	Dataset rarefied and filtered to keep OTUs with total abundance higher than 0.01% of the total number of reads	254	1177	4958
